# Supplementary material for: Ralstonia solanacearum Facing Spread-Determining Climatic Temperatures, Sustained Starvation, and Naturally Induced Resuscitation of Viable but Non-Culturable Cells in Environmental Water
Source: MDPI journal article supplement (doi:10.3390/microorganisms10122503), 2022-12-16
Supplement: s1 [file s1]

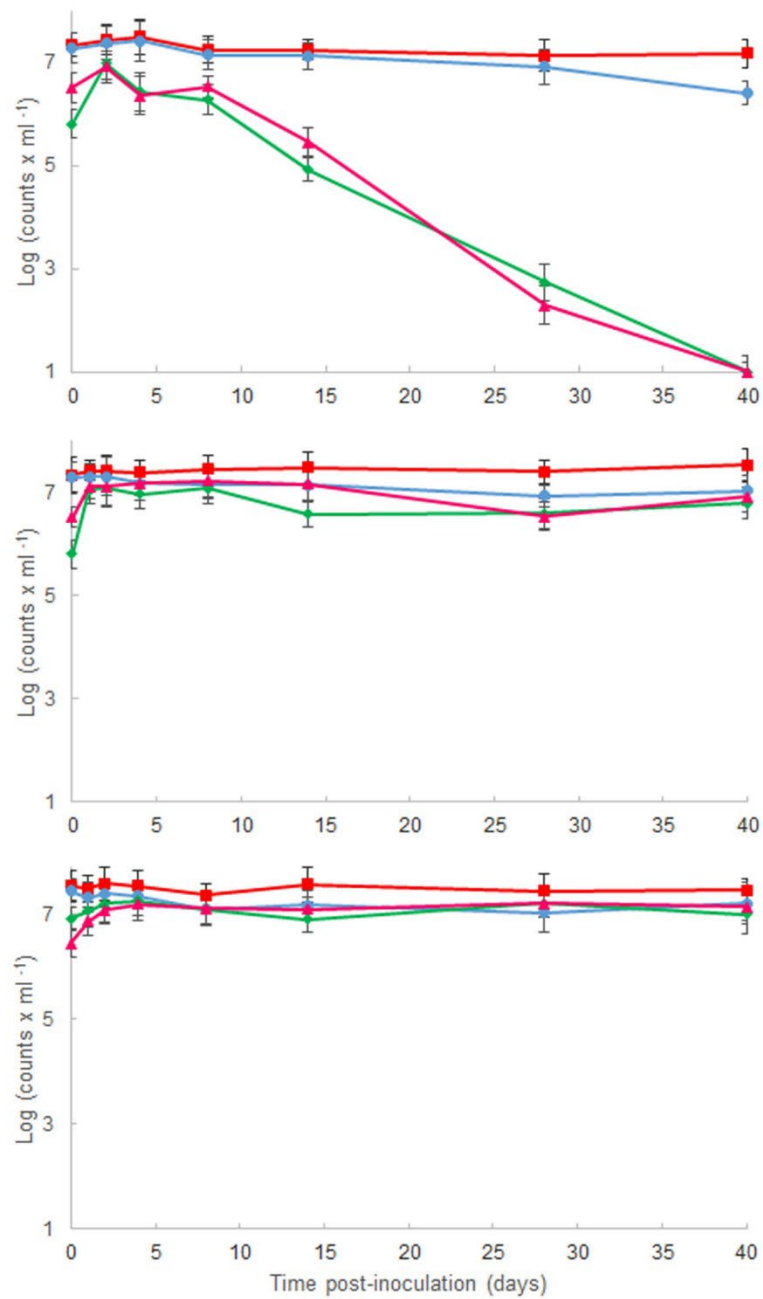

**Figure S2.** Effect of low temperature under nutrient-limiting conditions on survival of *Ralstonia solanacearum* strain IPO-1609 during 40-day periods in water. Microcosms of environmental water at: 4°C (top), 14°C (middle), and 24°C (bottom). Total (■), viable (●), and culturable cells on SMSA (▲) and YPGA (◆) media. Points are mean  $\pm$  standard deviation of triplicate microcosms.
